# Supplementary material for: Aptamer–Target–Gold Nanoparticle Conjugates for the Quantification of Fumonisin B1
Source: PubMed Central journal article supplement (PMC7827823; doi:10.3390/bios11010018), 2021-01-08
Supplement: biosensors-11-00018-s001.pdf [file biosensors-11-00018-s001.pdf]

Supplementary Information for:

## Aptamer-target-gold nanoparticle conjugates for the quantification of fumonisin B1

Vicente Antonio Mirón-Mérida<sup>1,\*</sup>, Yadira Gonzalez-Espinosa<sup>1</sup>, Mar Collado-González<sup>1</sup>, YunYun Gong<sup>1</sup>, Yuan Guo<sup>1</sup>, Francisco M. Goycoolea<sup>1,\*</sup>

<sup>1</sup>School of Food Science and Nutrition, University of Leeds, Leeds LS2 9JT, UK;

y.gonzalezespino@leeds.ac.uk (Y.G.E.); m.d.m.colladogonzalez@leeds.ac.uk (M.C.G.); y.gong@leeds.ac.uk (Y.Y.G.); y.guo@leeds.ac.uk (Y.G.)

\* Correspondence: fsvamm@leeds.ac.uk (V.A.M.M.); f.m.goycoolea@leeds.ac.uk (F.M.G)

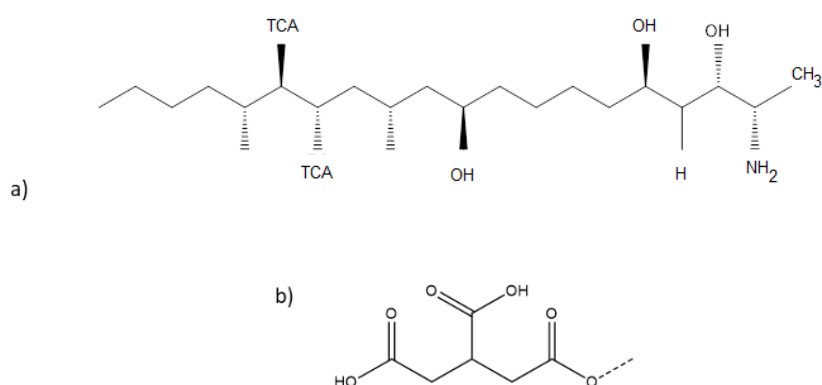

Figure S1. Structure representation of (a)FB1 and (b)tricarballic acid (TCA).

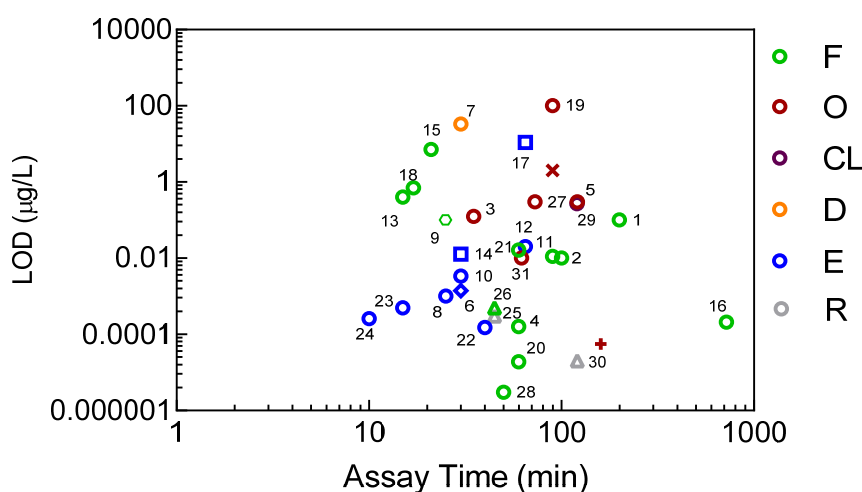

Figure S2. Comparison of the assays from this work with aptamer 96 nt for the analysis of the  $A_{650/520}$  ratio (X) and the AF4 peak 2 area at 600 nm (+) with other aptamer-based biosensors with fluorescent (green), optical (red), chemiluminescent (purple), deflection (yellow), electrochemical (blue) and Raman (grey) determinations with a 96 nt (circle), 80 nt (rhombus), 60 nt (hexagon), 40 nt (square) and not specified (triangle) sequence. Each labelled number represents a reference listed at the end of the supplementary materials.

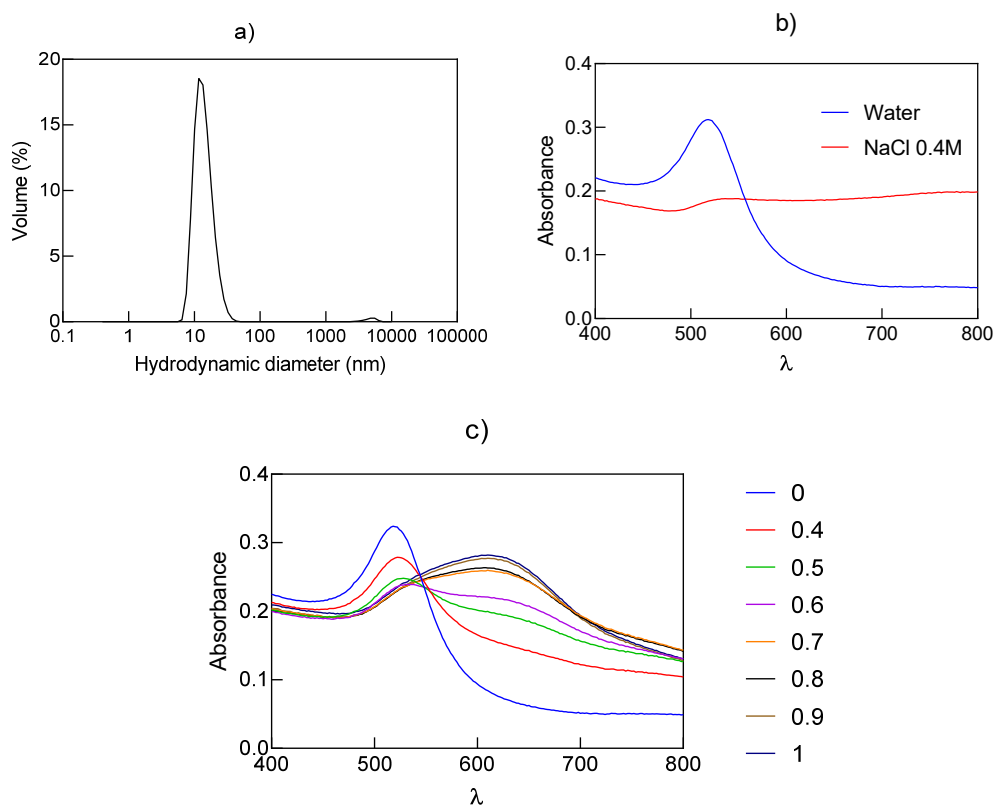

**Figure S3.** (a) Particle size distribution of AuNPs in Stock 1, (b) spectrophotometric scan ( $\lambda = 400-800$  nm) upon addition of water or NaCl 1:1 (v/v), and (c) aggregation profile of aptamer 40 nt-functionalized AuNPs (117:1 molar ratio) at different NaCl concentrations (0-1M).

**Table S1.** ANOVA for the incubation of FB1 with Aptamer 40 nt in three buffers.

| Sample | One-Way ANOVA ( <i>p</i> ) |                        |               |               |
|--------|----------------------------|------------------------|---------------|---------------|
|        |                            | Tris                   | PBS           | Mix           |
| Tris   | T0                         |                        | vsP0 (<0.05)  | vsM0 (<0.05)  |
|        | T10                        |                        | vsP10 (<0.05) | vsM10 (<0.05) |
|        | T100                       |                        | vsP100(<0.05) | vsM100(<0.05) |
| PBS    | P0                         | vsT0 (<0.05)           |               | vsM0 (<0.05)  |
|        | P10                        | vsT10 (<0.05)          |               | vsM10 (<0.05) |
|        | P100                       | vsT100(<0.05)          |               | vsM100(<0.05) |
| Mix    | M0                         | vsT0 (<0.05)           | vsP0 (<0.05)  |               |
|        | M10                        | vsT10 (<0.05)          | vsP10 (<0.05) |               |
|        | M100                       | vsT100 ( <b>0.33</b> ) | vsP100(<0.05) |               |

Incubation: Aptamer 40 nt: AuNP molar ratio (117:1), FB1-aptamer incubation (60 min, 37 °C), AuNP incubation (120 min, 37 °C). Tris-HCl buffer: 31.1 mM, PBS: 12.79 mM, Mix: Tris-HCl buffer 31.1 mM + PBS 12.79 mM (NaCl yield).

a)

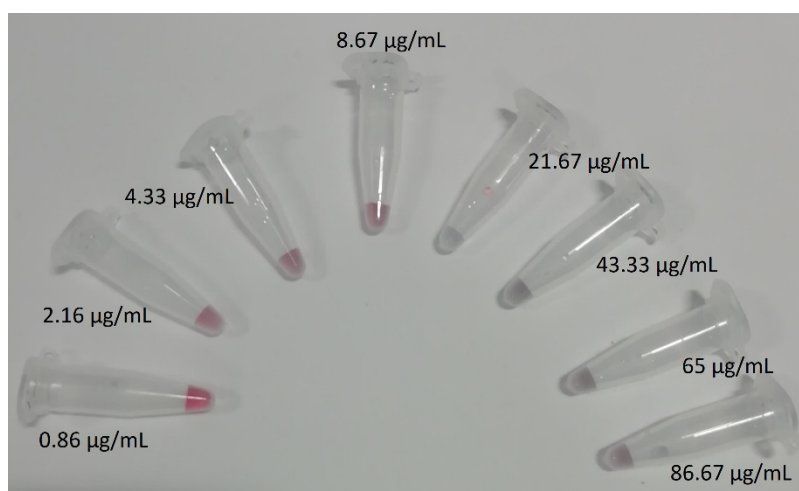

b)

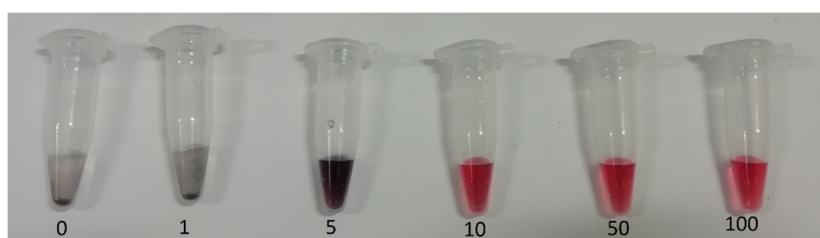

**Figure S4.** (a) Colorimetric effect from the incubation of aptamer 40 nt and FB1 (0.86-86.67  $\mu\text{g/mL}$ , 60 min, 37  $^{\circ}\text{C}$ ) with Stock 1 (117:1 Aptamer:AuNP molar ratio, 120 min, 37  $^{\circ}\text{C}$ ) after the addition of NaCl (0.4 M, 1:1 v:v) and (b) the incubation of FB1(0-100  $\mu\text{g/mL}$ ) with Stock 1 (117:1 aptamer:AuNP molar ratio, 120 min, 37  $^{\circ}\text{C}$ ) Note: FB1 was dissolved in a mixture of Tris-HCl (31.1 mM) and PBS (NaCl 12.79 mM yield) buffers.

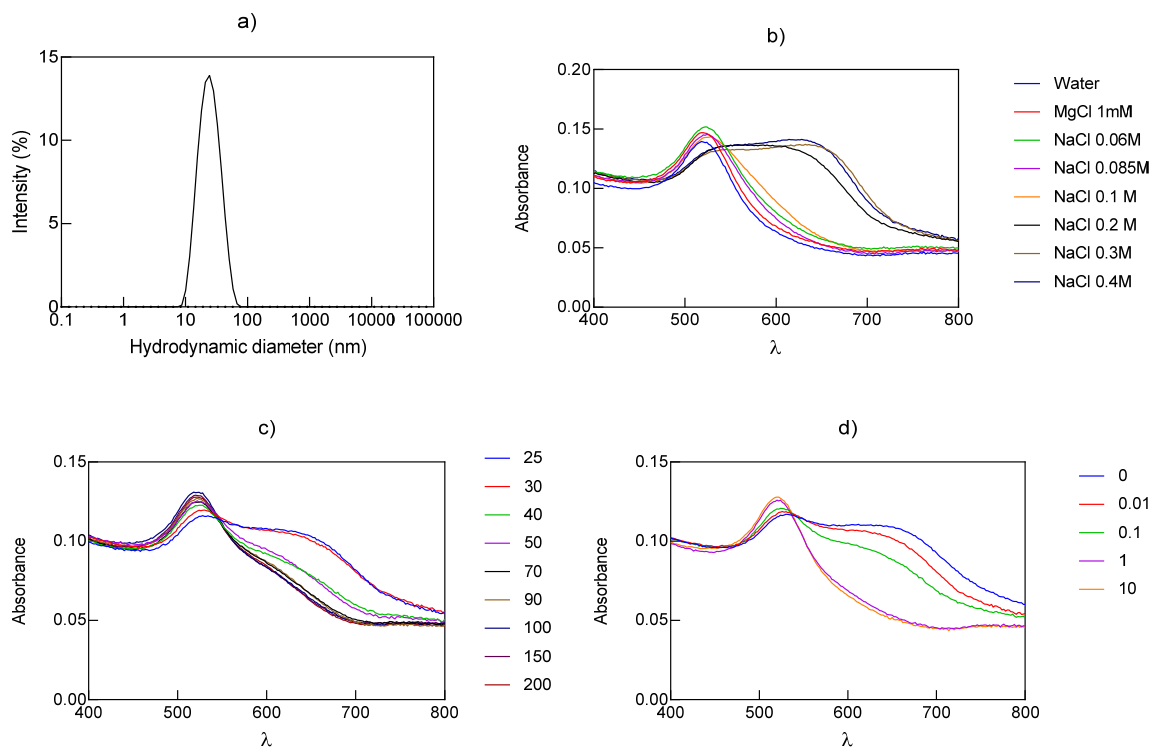

**Figure S5.** (a) Particle size distribution of AuNP in Stock 2, (b) Wavelength ( $\lambda = 400-800$  nm) scan of AuNP upon addition of water, MgCl<sub>2</sub> and NaCl (1:1 v/v), (c) Wavelength ( $\lambda = 400-800$  nm) scan of AuNP functionalized with different molar ratios of aptamer 96 nt after the addition of NaCl (0.2 M), (d) aggregation profile of functionalized AuNP with aptamer 96 nt (30:1 molar ratio) and different concentrations of FB1 after the addition of NaCl 0.2 M.

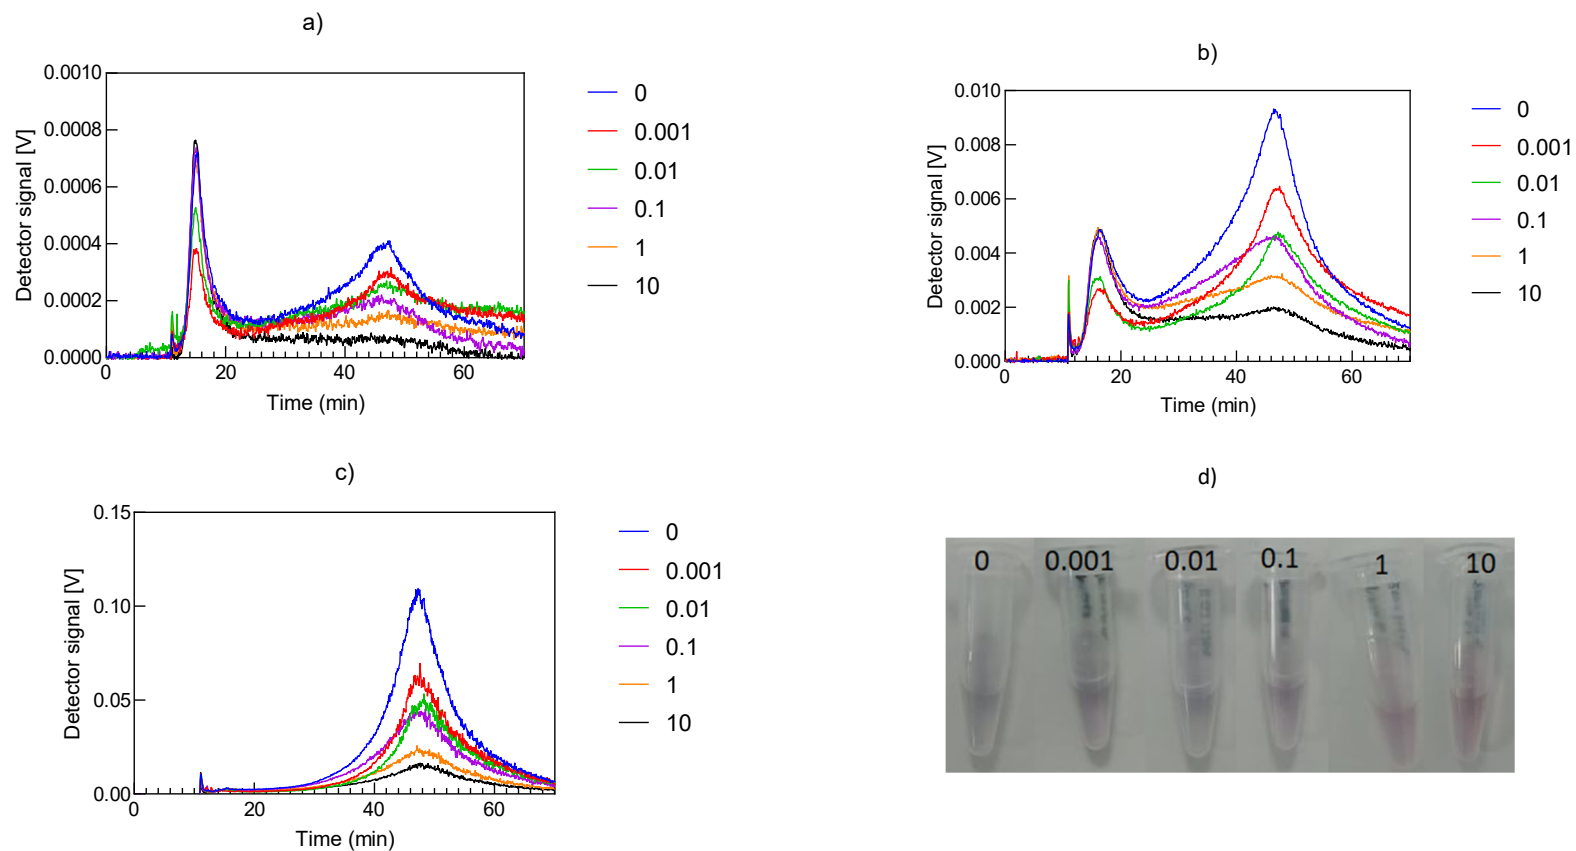

**Figure S6.** Fractograms of the FB1-Aptamer 96 nt-AuNP conjugates at different FB1 concentrations (0-10  $\mu\text{g/mL}$ ) after the addition of NaCl 0.2 M detected by AF4 through UV/VIS,  $\lambda = 520 \text{ nm}$  (a),  $\lambda = 600 \text{ nm}$  (b), MALS  $28^\circ$  (c) signals, and (d) their colorimetric aggregation profile.

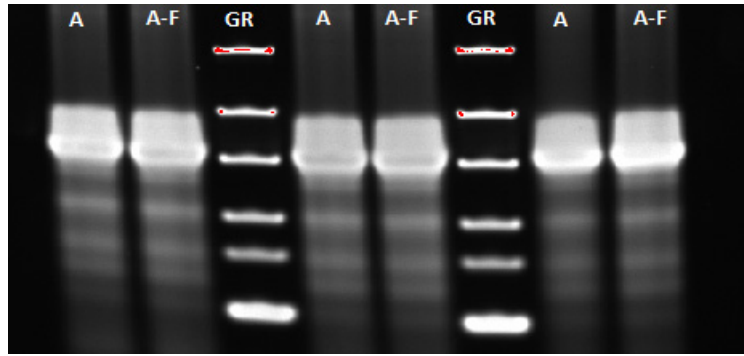

**Figure S7.** Characterization of aptamer 96 nt (A) and aptamer 96 nt-FB1 (A-F) in 14% polyacrylamide gel revealed in ChemiDoc™ (Bio Rad) and analyzed in ImageJ. GR: Gene ruler ultra low range DNA Ladder, ready-to-use (SM1213, Thermofisher); Total volume per well 6  $\mu$ L: 5  $\mu$ L of aptamer 96 nt (9.3874  $\mu$ M) or its combination with FB1 (340.11  $\mu$ M) in  $MgCl_2$  1 mM + 1  $\mu$ L DNA loading dye. FB1/Aptamer 96 nt molar ratio=36.2305 (equivalent to incubating with 10.02  $\mu$ g/mL). Electrophoresis at 120 V for 3 h 30 min in TAE buffer, followed by 1 h fixation (10 % acetic acid,40% methanol, 50% water), and 1 h in SYBR gold 1X.

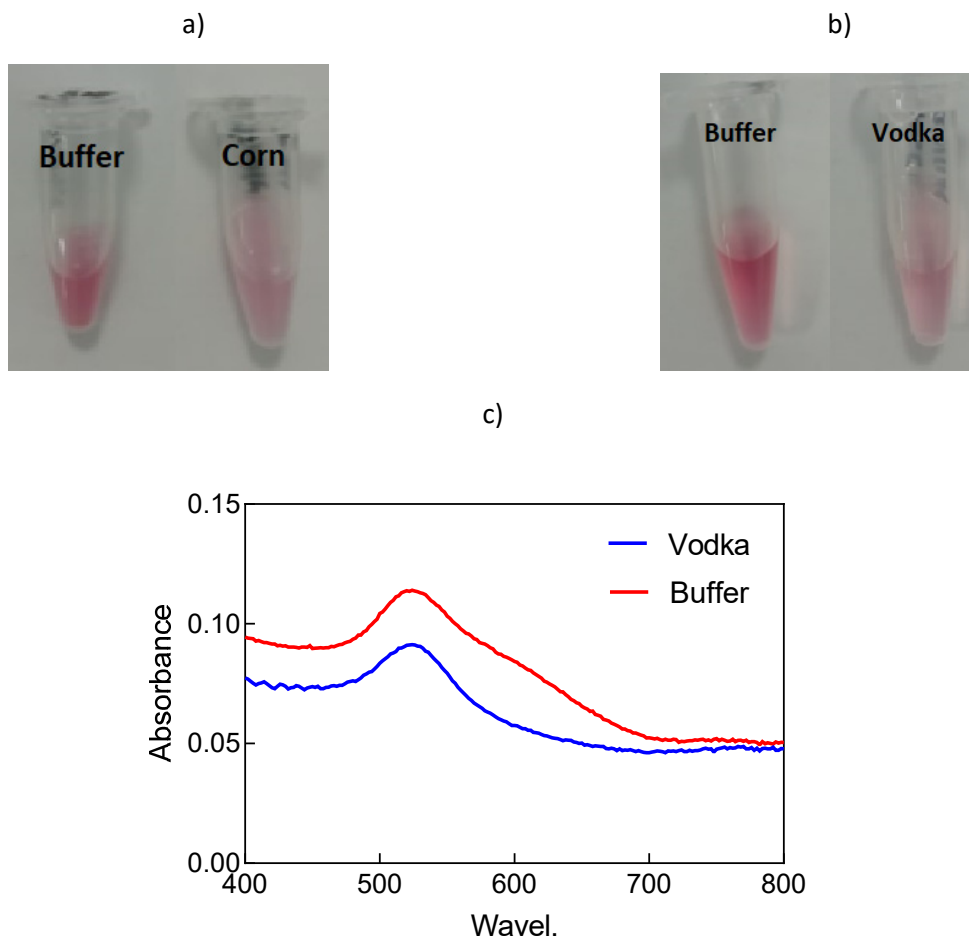

**Figure S8.** Aptamer 96 nt-FB1-AuNP conjugates for the incubation with FB 1 a) 10  $\mu$ g/mL in buffer and corn extracted with 5% methanol and b) 1  $\mu$ g/mL in buffer and vodka. (NB: Aptamer 96 nt: AuNP molar ratio 30:1, Aptamer-FB1 incubation: 37  $^{\circ}$ C for 30 min, Incubation with Stock 2: 1 h at R. Binding buffer:  $MgCl_2$  1 mM).

## References

- 1 Wu, S., Duan, N., Ma, X., Xia, Y., Wang, H., Wang, Z. and Zhang, Q. 2012. Multiplexed fluorescence resonance energy transfer aptasensor between upconversion nanoparticles and graphene oxide for the simultaneous determination of mycotoxins. *Analytical Chemistry*. 84(14), pp.6263-6270.
- 2 Wu, S., Duan, N., Li X., Tan, G., Ma, X., Xia, Y., Wang, Z. and Wang, H. 2013. Homogenous detection of fumonisin B1 with a molecular beacon based on fluorescence energy transfer between NaYF<sub>4</sub>:Yb, Ho upconversion nanoparticles and gold nanoparticles. *Talanta*. 116(15), pp.611-618.
- 3 Wang, W., Wu, S., Ma, X., Xia, Y., Wang, Z. 2013. Novel methods for fumonisin B1 detection based on AuNPs labelling and aptamer recognition. *Journal of Food Science and Biotechnology*. 32(5).
- 4 Yue, S., Jie, X., Wei, L., Bin, C., Dou, W.D., Yi, Y., QingXia, L., JianLin, L. and TieSong, Z. 2014. Simultaneous detection of ochratoxin A and fumonisin B1 in cereal samples using an aptamer-photonic crystal encoded suspension array. *Analytical Chemistry*. 86(23), pp.11797-11802.
- 5 Zhao, Y., Luo, Y., Li, T. and Song, Q. 2014. Au NPs driven electrochemiluminescence aptasensors for sensitive detection of fumonisin B1. *RSC Advances*, 4, pp.57709-57714.
- 6 Chen, X., Huang, Y., Ma, X., Jia, F., Guo, X. and Wang, Z. 2015. Impedimetric aptamer-based determination of the mold toxin fumonisin B1. *Microchimica Acta*. 182(9-10), pp.1709-1714.
- 7 Chen, X., Bai, X., Li, H. and Zhang, B. 2015. Aptamer-based microcantilever array biosensor for detection of fumonisin B1. *RSC Advances*. 5, pp.35448-35452.
- 8 Shi, Z.-Y., Zheng Y.-T., Zhang, H.-B., He, C.-H., Wu, W.-D. and Zhang, H.-B. 2015. DNA electrochemical aptasensor for detecting fumonisin B1 based on graphene and thionine nanocomposite. *Electroanalysis*. 27(5), pp.1097-1103.
- 9 Gui H, Jin Q, Zhang Y, Wang X, Yang Y, Shao C, Cheng C, Wei F, Yang Y, Yang M, Song H (2015) Development of an aptamer/ fluorescence dye PicoGreen-based method for detection of fumonisin B1. *Sheng Wu Gong Cheng Xue Bao*. 31(9), pp.1393-1400.
- 10 Ren, C., Li, H., Lu, X., Quian, J., Zhu, M., Chen, W., Liu, Q., Hao, N. Li, H. and Wang, K. 2017. A disposable aptasensing device for label-free detection of fumonisin B1 by integrating PDMS film-based micro-cell and screen-printed carbon electrode. *Sensors and actuators B: Chemical*. 251, pp.192-199.
- 11 Yang, Y., Li, W., Shen, P. Liu, R., Li, Y., Xu, J., Zheng, Q., Zhang, Y., Li, J. and Zheng, T. 2017. Aptamer fluorescence signal recovery screening for multiplex mycotoxins in cereal samples based on photonic crystal microsphere suspension array. *Sensors and Actuators B: Chemical*. 248, pp.351.358.
- 12 Wang, C., Qian, J., An, K., Huang, X., Zhao, L., Liu, Q., Hao, N., Wang, K. 2017 Magneto-controlled aptasensor for simultaneous electrochemical detection of dual mycotoxins in maize using metal sulfide quantum dots coated silica as labels. *Biosensors and Bioelectronics*. 89, pp.802-809.
- 13 Molinero-Fernández, A., Moreno-Guzmán, M., Ángel López, M., Escarpa, A. 2017. Biosensing strategy for simultaneous and accurate quantitative analysis of mycotoxins in food samples using unmodified graphene micromotors. *Analytical Chemistry*. 89, pp.10850-10857.
- 14 Tian, H., Sofer, Z., Pumera, M., Bonanni, A. 2017. Investigation on the ability of heteroatom-doped graphen for biorecognition. *Nanoscale*. 9, pp.3530-3536.
- 15 王红旗, 王俊艳, 洪慧杰, 尹海燕, Maragos, C., 张玲, 刘继红. 2017. 伏马毒素 B1 核酸适配体链置换探针的筛选及应用. *农产品质量与安全*. 1, pp.44-48.
- 16 Liu, R., Li, W., Cai, T., Deng, Y., Ding, Z., Liu, Y., Zhu, X., Wang, X., Liu, J., Liang, B., Zheng, T., LI, J. 2018. TiO<sub>2</sub> nanolayer-enhanced fluorescence for simultaneous multiplex mycotoxin detection by aptamer microarrays on a porous silicon surface. *Applied Materials and Interfaces*. 10, pp.14447-14453.
- 17 Cheng, Z., Bonanni, A. 2018. All-in-One: Electroactive nanocarbon as simultaneous platform and label for single-step biosensing. *Nanomaterials*. 24, pp.6380-6385.
- 18 Molinero-Fernández, A., Jodra, A., Moreno-Guzmán, M., López, M.A., Escarpa, A. 2018. Magnetic reduced graphene oxide/nickel/platinum nanoparticles micromotors for mycotoxin analysis. *Chemistry A European Journal*. 24, pp.7172-7176.
- 19 Hao, N., Lu, J., Zhou, Z., Hua, R., Wang, K. 2018. A pH-resolved colorimetric biosensor for simultaneous multiple target detection. *ACS Sensors*. 3, pp.2159-2165.
- 20 Niazi, S., Khan, I.M., Yan, L., Khan, M.I., Mohsin, A., Duan, N., Wu, S., Wang, Z. 2019. Simultaneous detection of fumonisin B1 and ochratoxin A using dual-color, time-resolved luminescent nanoparticles (NaYF<sub>4</sub>: Ce, Tb and NH<sub>2</sub>-Eu/DPA@SiO<sub>2</sub>) as labels. *Analytical and Bioanalytical Chemistry*. 411, pp.1453-1465.
- 21 Wang, C., Huang, X., Tian, X., Zhang, X., Yu, S., Chang, X., Ren, Y., Qian, J. 2019. A multiplexed FRET aptasensor for the simultaneous detection of mycotoxins with magnetically controlled graphene

- oxide/Fe<sub>3</sub>O<sub>4</sub> as a single energy acceptor. *Analyst*, 144(20), 6004-6010.  
<https://doi.org/10.1039/C9AN01593K>
- 22 Wei, M., Zhao, F., Feng, S., Jin, H. 2019. A novel electrochemical aptasensor for fumonisin B 1 determination using DNA and exonuclease-I as signal amplification strategy. *BMC chemistry*, 13(1), 1-6. <https://doi.org/10.1186/s13065-019-0646-z>
- 23 Han, Z., Tang, Z., Jiang, K., Huang, Q., Meng, J., Nie, D., Zhao, Z. 2020. Dual-target electrochemical aptasensor based on co-reduced molybdenum disulfide and Au NPs (rMoS<sub>2</sub>-Au) for multiplex detection of mycotoxins. *Biosensors and Bioelectronics*, 150, 111894. <https://doi.org/10.1016/j.bios.2019.111894>
- 24 Wei, M., Xin, L., Feng, S., Liu, Y. 2020. Simultaneous electrochemical determination of ochratoxin A and fumonisin B1 with an aptasensor based on the use of a Y-shaped DNA structure on gold nanorods. *Microchimica Acta*, 187(2), 1-7. <https://doi.org/10.1007/s00604-019-4089-y>
- 25 He, D., Wu, Z., Cui, B., Xu, E. 2020. Aptamer and gold nanorod-based fumonisin B1 assay using both fluorometry and SERS. *Microchimica Acta*, 187(4), 1-8. <https://doi.org/10.1007/s00604-020-4192-0>
- 26 He, D., Wu, Z., Cui, B., Xu, E. 2020. Aptamer and gold nanorod-based fumonisin B1 assay using both fluorometry and SERS. *Microchimica Acta*, 187(4), 1-8. <https://doi.org/10.1007/s00604-020-4192-0>
- 27 Tao, Z., Zhou, Y., Li, X., & Wang, Z. (2020). Competitive HRP-Linked Colorimetric Aptasensor for the Detection of Fumonisin B1 in Food based on Dual Biotin-Streptavidin Interaction. *Biosensors*, 10(4), 31. <https://doi.org/10.3390/bios10040031>
- 28 He, D., Wu, Z., Cui, B., Jin, Z., Xu, E. 2020. A fluorometric method for aptamer-based simultaneous determination of two kinds of the fusarium mycotoxins zearalenone and fumonisin B1 making use of gold nanorods and upconversion nanoparticles. *Microchimica Acta*, 187, 254. <https://doi.org/10.1007/s00604-020-04236-4>
- 29 Jiang, D., Huang, C., Shao, L., Wang, X., Jiao, Y., Li, W., Chen, J. and Xu, X., 2020. Magneto-controlled aptasensor for simultaneous detection of ochratoxin A and fumonisin B1 using inductively coupled plasma mass spectrometry with multiple metal nanoparticles as element labels. *Analytica Chimica Acta*, 1127, pp.182-189.
- 30 Wu, Y., Yu, J., Li, F., Li, J. and Shen, Z., 2020. A Calibration Curve Implanted Enzyme-Linked Immunosorbent Assay for Simultaneously Quantitative Determination of Multiplex Mycotoxins in Cereal Samples, Soybean and Peanut. *Toxins*, 12(11), p.718.
- 31 Zheng, Y.T., Zhao, B.S., Zhang, H.B., Jia, H. and Wu, M., 2020. Colorimetric aptasensor for fumonisin B1 detection by regulating the amount of bubbles in closed bipolar platform. *Journal of Electroanalytical Chemistry*, 877, p.114584.
